# Supplementary material for: Impact of polymorphisms in DNA repair genes XPD, hOGG1 and XRCC4 on colorectal cancer risk in a Chinese Han Population
Source: Oxford University Press journal article supplement (doi:10.1042/bsr20181074), 2018-11-14
Supplement: bsr-2018-1074_supp.pdf [file bsr-2018-1074_supp.pdf]

Table S1 Characteristics of patients with CRC and controls

| Parameters               | CRC group (n=225) | Control group (n=200) | $\chi^2$ -value | <i>p</i> -value |
|--------------------------|-------------------|-----------------------|-----------------|-----------------|
| Age (years)              |                   |                       | 6.018           | 0.111           |
| 20~40                    | 7(3.00%)          | 8(4.00%)              |                 |                 |
| 41~60                    | 101(44.89%)       | 102(51.00%)           |                 |                 |
| 61~80                    | 112(49.78%)       | 90(45.00%)            |                 |                 |
| ≥81                      | 5(2.22%)          | 0(0.00%)              |                 |                 |
| Gender                   |                   |                       | 0.461           | 0.497           |
| Male                     | 140(62.22%)       | 118(59.00%)           |                 |                 |
| Female                   | 85(37.78%)        | 82(41.00%)            |                 |                 |
| BMI (kg/m <sup>2</sup> ) | 25.84±6.55        | 25.79±6.83            | 0.077           | 0.939           |
| Smoking status           |                   |                       | 0.058           | 0.810           |
| Yes                      | 111(49.33%)       | 101(50.50%)           |                 |                 |
| No                       | 114(50.67%)       | 99(49.50%)            |                 |                 |
| Alcohol consumption      |                   |                       | 2.702           | 0.1             |
| Yes                      | 54(24.00%)        | 35(17.50%)            |                 |                 |
| No                       | 171(76.00%)       | 165(82.50%)           |                 |                 |
